# Supplementary material for: A study on the removal of propyl, butyl, and benzyl parabensvianewly synthesised ionic liquid loaded magnetically confined polymeric mesoporous adsorbent
Source: Royal Society of Chemistry journal article supplement (doi:10.1039/c8ra03408g), 2018-01-01
Supplement: c8ra03408g1.pdf [file c8ra03408g1.pdf]

**List of supplementary information:**

**Fig. S1.** IMAGE J analysis and SEM images of (a) MNP, (b) MNP- $\beta$ CD-TDI, and (c) IL-MNP- $\beta$ CD-TDI, as well as TEM images of (a') MNP, (b') MNP- $\beta$ CD-TDI, and (c') IL-MNP- $\beta$ CD-TDI.

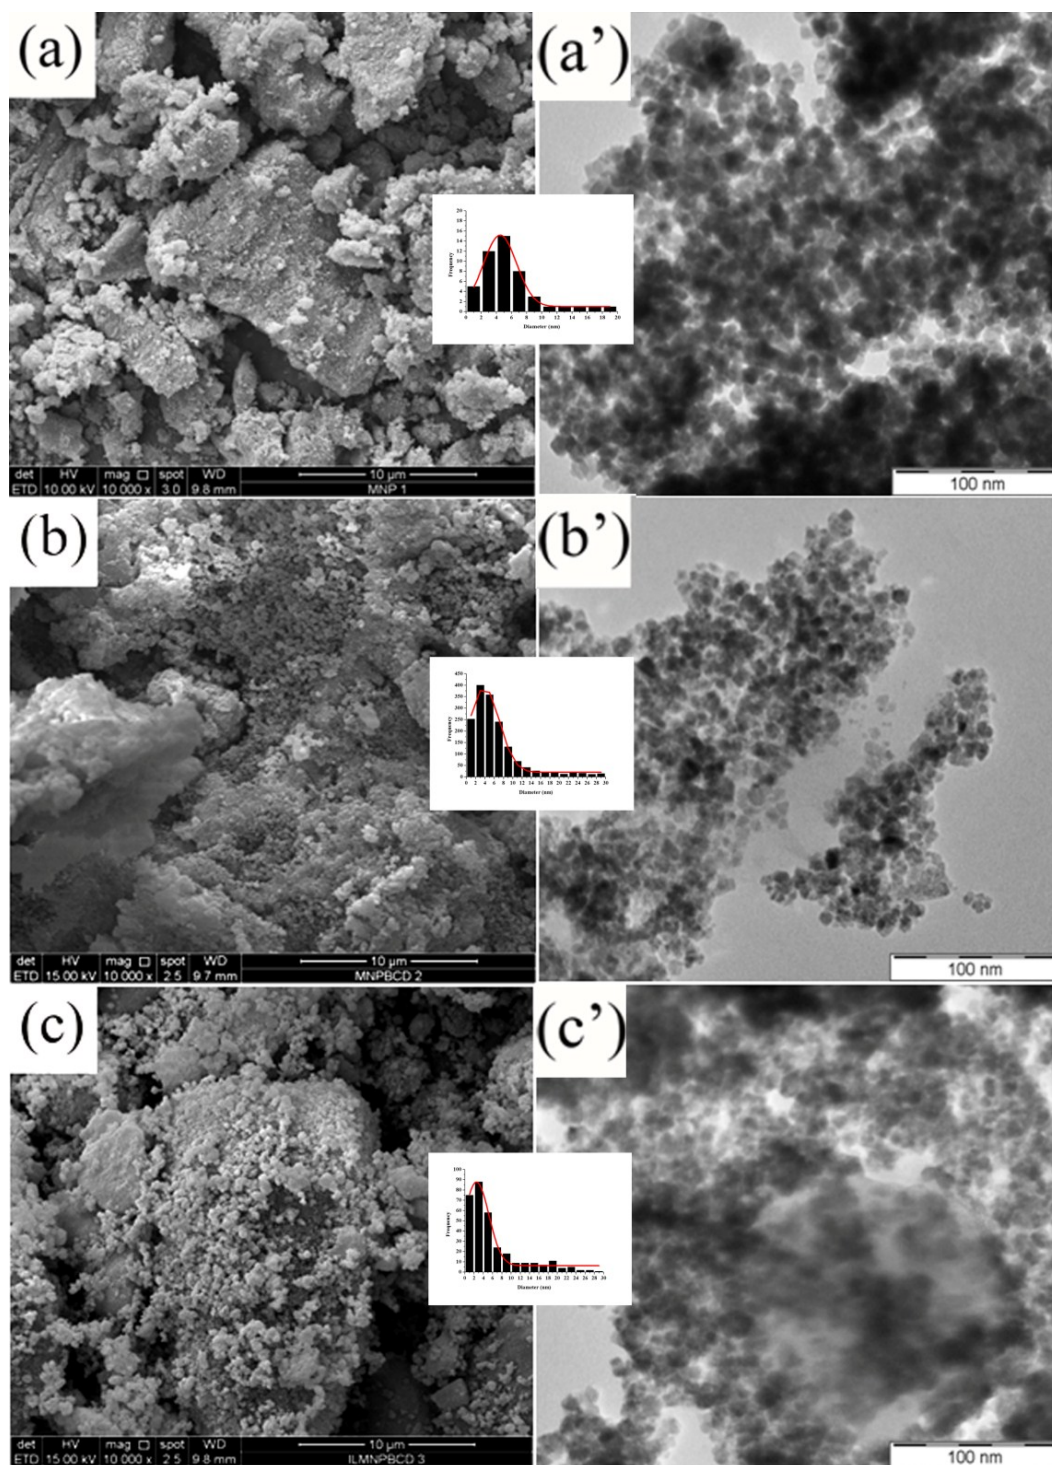

**Fig. S1.** IMAGE J analysis and SEM images of (a) MNP, (b) MNP- $\beta$ CD-TDI, and (c) IL-MNP- $\beta$ CD-TDI, as well as TEM images of (a') MNP, (b') MNP- $\beta$ CD-TDI, and (c') IL-MNP- $\beta$ CD-TDI.
